# Supplementary material for: Leaf-associated microbiomes of grafted tomato plants
Source: PubMed Central journal article supplement (PMC6370777; doi:10.1038/s41598-018-38344-2), 2019-02-11
Supplement: 41598_2018_38344_MOESM1_ESM.pdf [file 41598_2018_38344_MOESM1_ESM.pdf]

## Supplementary Information:

### Leaf-associated microbiomes of grafted tomato plants

Hirokazu Toju<sup>1,2\*</sup>, Koji Okayasu<sup>3</sup> and Michitaka Notaguchi<sup>2,3</sup>

<sup>1</sup>Center for Ecological Research, Kyoto University, Otsu, Shiga 520-2133, Japan

<sup>2</sup>Precursory Research for Embryonic Science and Technology (PRESTO), Japan Science and Technology Agency, Kawaguchi, Saitama 332-0012, Japan

<sup>3</sup>Graduate School of Bioagricultural Sciences, Nagoya University, Furo-cho, Chikusa-ku, Nagoya, Aichi, 464-8601 Japan

\*Correspondence and requests for materials should be addressed to H.T. (email: [toju.hirokazu.4c@kyoto-u.ac.jp](mailto:toju.hirokazu.4c@kyoto-u.ac.jp)).

#### **This file includes:**

**Supplementary Table 1.** Tomato cultivars used in this study.

**Supplementary Figure 1.** Relationships between the number of sequencing reads and that of OTUs.

**Supplementary Table 1.** Tomato cultivars used in this study.

| <b>Stock cultivars</b>                         | <b>Traits/origin</b>                                                                        | <b>Providing company</b> |
|------------------------------------------------|---------------------------------------------------------------------------------------------|--------------------------|
| <i>Solanum lycopersicum</i> cv Chibikko        | A dwarf, fresh-eating/ornamental cultivar                                                   | Marutane Co., Ltd.       |
| <i>Solanum lycopersicum</i> cv Ganbarune       | A stock cultivar with increased disease resistance                                          | Aisan Seed Co., Ltd.     |
| <i>Solanum lycopersicum</i> cv M82             | A processing tomato cultivar, originated from the United States of America                  | –                        |
| <i>Solanum lycopersicum</i> cv Micro-Tom       | A dwarf, ornamental cultivar generated by crossing 'cv Florida Basket' and 'cv Ohio 4013-3' | –                        |
| <i>Solanum lycopersicum</i> cv Regina          | A dwarf, ornamental cultivar, originated from Latin America                                 | Sakata Seed Co.          |
| <i>Solanum lycopersicum</i> cv Spike           | A stock cultivar with enhanced growth                                                       | Aisan Seed Co., Ltd.     |
| <i>Solanum lycopersicum</i> cv Triper          | A stock cultivar with increased disease resistance                                          | Aisan Seed Co., Ltd.     |
| <i>Solanum lycopersicum</i> cv Momotaro-Haruka | A disease-resistant, fresh-eating cultivar                                                  | Takii Co., Ltd.          |

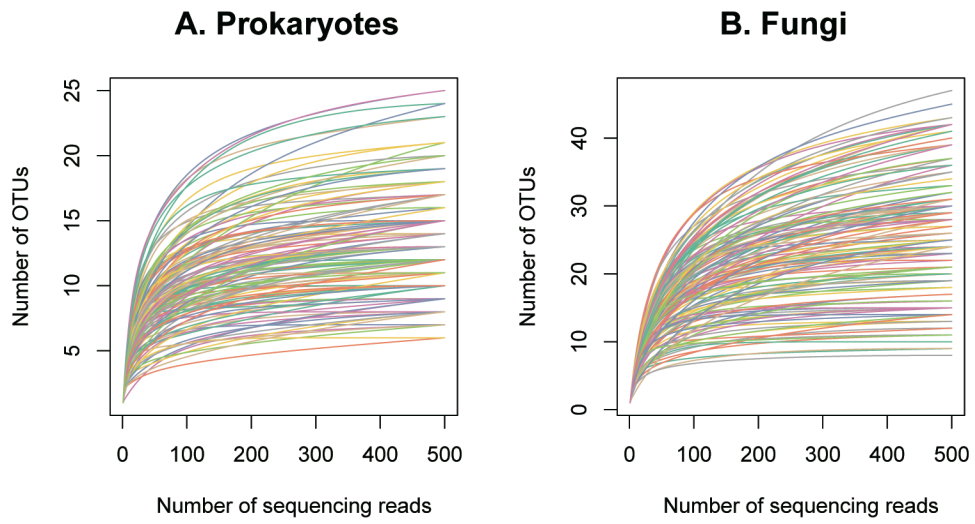

**Supplementary Figure 1.** Relationships between the number of sequencing reads and that of OTUs.
